# Supplementary material for: Reducing Endogenous Labile Zn May Help to Reduce Smooth Muscle Cell Injury around Vascular Stents
Source: MDPI journal article supplement (doi:10.3390/ijms23095139), 2022-05-05
Supplement: s1 [file s1]

## Supplementary information

### Reducing endogenous labile Zn may help to reduce the smooth muscle cell injury around vascular stent

Zheng Zeng <sup>a, 1</sup>, Yinong Xie <sup>a</sup>, Li Li <sup>a</sup>, Huanran Wang <sup>a</sup>, Jianying Tan <sup>a</sup>, Xia Li <sup>a</sup>, Qihao Bian <sup>a</sup>, Yu Zhang <sup>a</sup>, Tao Liu <sup>b, \*</sup>, Yajun Weng <sup>a, \*</sup>, and Junying Chen <sup>a, \*</sup>

<sup>a</sup>Key Laboratory of Advanced Technology of Materials, Ministry of Education.

School of Materials Science and Engineering, Southwest Jiaotong University, Chengdu, Sichuan, 610031, China

<sup>b</sup> Medical College of Acu-Moxi and Rehabilitation, Guanzhou University of Chinese Medicine

Guangzhou, Guangdong, 510006, China

#### 1. Supplementary figure

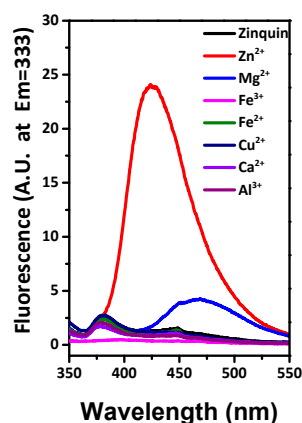

**Figure S1.** Specific fluorescence detection of Zinquin measured by fluorescence spectrophotometer.

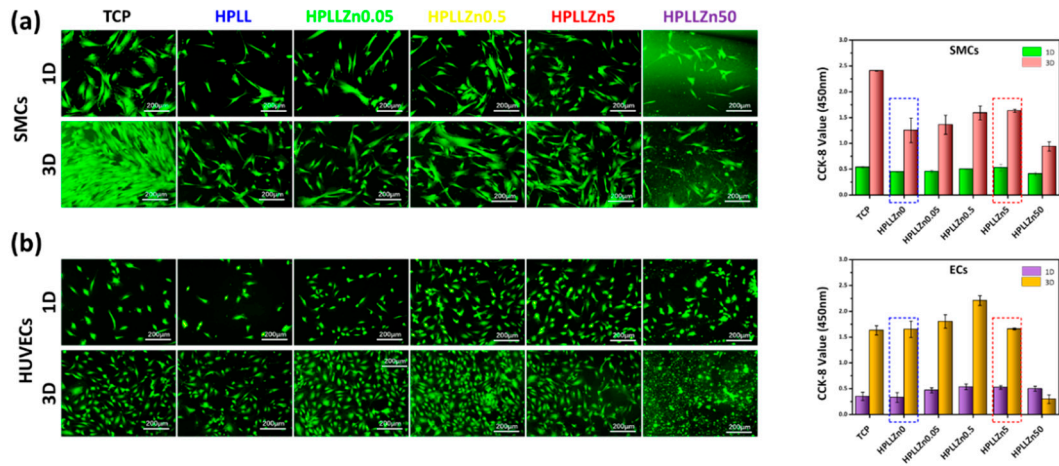

**Figure S2.** The influence of different zinc ion concentration gradient on cell viability.

The cell viabilities were detected after the incubation with ECs (A) and SMCs (B) for 1 day and 3 days, separately. The highest zinc ion concentration that can maintain cell viability was selected for the research object. (HPLLZn0 was renamed HPLL, and HPLLZn5 was renamed HPLLZn in the full paper).

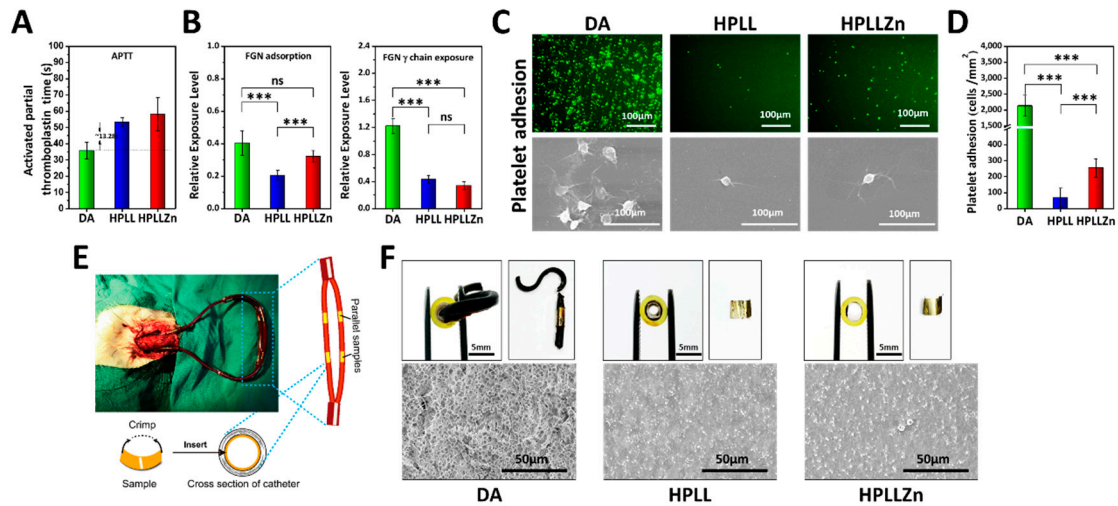

**Figure S3.** Evaluation of the performance of anticoagulation. (A) Activated partial thromboplastin time test. (B) Fibrinogen adsorption and the fibrinogen  $\gamma$  chain exposure. (C) Rhodamine 123 fluorescence images and SEM images of the platelet adhesion. (D) Quantitative statistics of the platelet adhesion. (E) The schematic of ex-vivo blood

circulation through the New Zealand white rabbit's carotid arteriovenous and the samples preparation. (F) Occlusion results of different coatings after 2-hours ex-vivo blood circulation and the thrombus formation on different coatings.

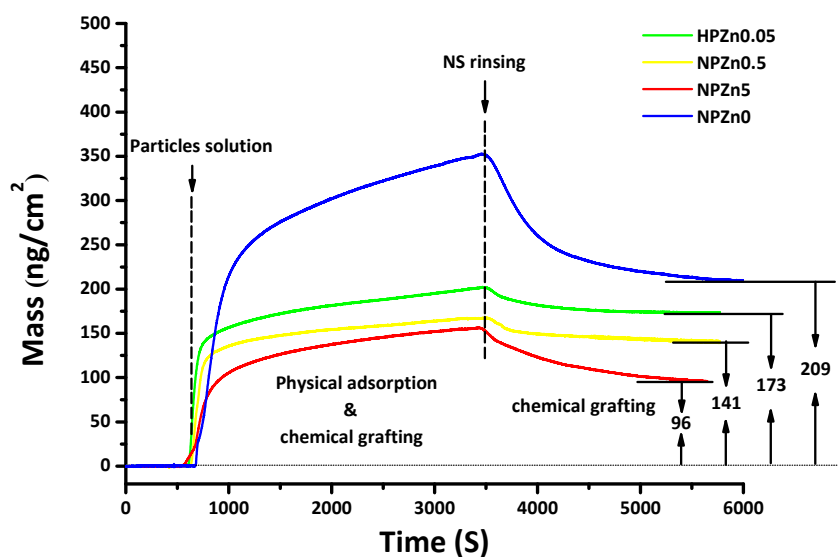

**Figure S4. Real-time observation of complexes immobilization by quartz crystal microbalance with dissipation (QCM-D)**

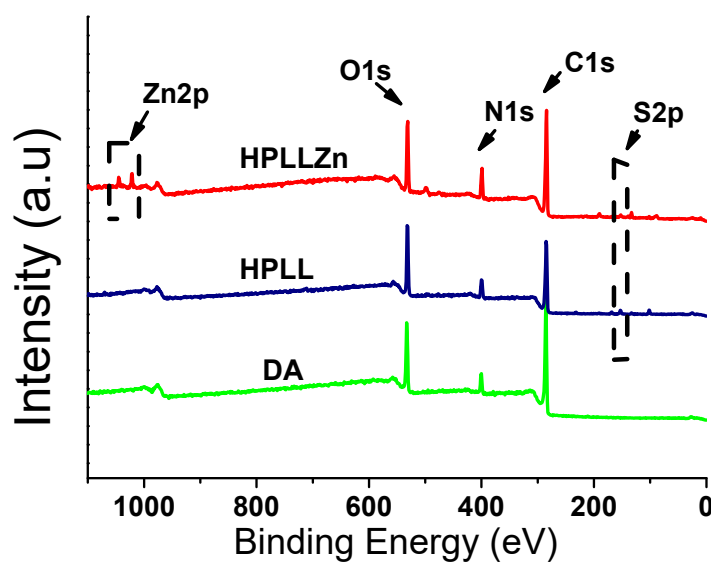

**Figure S5. XPS wide-scan of HPLL particles and HPLLZn particles modified coatings**

## **2. Supplementary experiment**

### **S2.1 APTT assays**

Activated partial thromboplastin time (APTT) were measured to evaluate the influence on the coagulation enzyme system. In detail, 500 $\mu$ l PPP added to the samples and incubated at 37°C for 30 min. After that, 100 $\mu$ l incubated PPP was transferred to the test tube, followed by addition of 100 $\mu$ l APTT agent and incubated at 37°C for 3min. Subsequently 100 $\mu$ l 0.025M CaCl<sub>2</sub> was added and the clotting time was measured in an automatic blood coagulation analyzer (ACL-200, Beckman Coulter, USA). Data were presented as mean  $\pm$  SD (n = 3)

### **S2.2. Fibrinogen adsorption and the degeneration**

Fibrinogen is the risk protein factors to effect thrombus form. The experiments to investigated fibrinogen adsorption and degeneration were very necessary and the operation was to add the platelet-poor plasma (PPP) on the sample surface incubated at 37°C. After 2h later, rinsed three times with PBS and blocked the nonspecific adsorption by bull serum albumin (1:10 in PBS) at 37°C for 1h. Subsequently the first antibody (mouse anti-human fibrinogen antibody (1:1000 in PBS) for adsorption and mouse monoclonal to anti-human fibrinogen gamma chain antibody (ab136520) for degeneration) were added on the sample surface and incubated at 37°C for 1h. Washed three times with PBS for 3min each and added 100 $\mu$ l Horseradish peroxidase (HRP)-conjugated goat anti-mouse IgG antibody (second antibody, 1:5000 in PBS) on the surface incubated at 37°C for 30 min. After that rinsed three times with PBS for 3min each, 100 $\mu$ l TMB agent was added to the sample surface and reacted for 10min. The color reaction was stopped by adding 50 $\mu$ l of 1M H<sub>2</sub>SO<sub>4</sub> and 100 $\mu$ l of the reaction

solution was transferred to a 96-well plate; the absorbance was measured at 450nm.

Data were presented as mean  $\pm$  SD (n = 4)

### **S2.3. Platelet adhesion**

Platelets-rich plasma (PRP) were obtained from fresh human whole blood by centrifuged at 1500rpm for 15min. Then the samples were immersed into the 0.5mL PRP and incubated at 37°C for 30min. Subsequently, the sample were rinsed three times with PBS for seconds. Fixed in 2.5% glutaraldehyde for 12h at RT. Finally, the samples stained by Rhodamine 123 fluorescent dye. Data were presented as mean  $\pm$  SD (at least 8 pictures for cell counting)

### **S2.4. Ex-vivo blood circulation assessment of antithrombus**

DA coating was prepared on the 316SS foils and immersed in different particles coatings solution at 20 °C with shock on table concentrator for 12-hours. The foils with different coating insert to the catheter which go through the New Zealand white rabbit's carotid arteriovenous. After 2-hours blood flow, the catheters were collected and fixed with 4% paraformaldehyde overnight. (n = 2)

### **S2.5. Cell lines and culture conditions**

ECs were isolated from human umbilical vein and SMCs were isolated from human umbilical artery. The details are available from the previous work[1].

[1] T. Liu, Y. Liu, Y. Chen, S. Liu, M.F. Maitz, X. Wang, K. Zhang, J. Wang, Y. Wang, J. Chen, N. Huang, Immobilization of heparin/poly-(L)-lysine nanoparticles on dopamine-coated surface to create a heparin density gradient for selective direction of platelet and vascular cells behavior, *Acta Biomater.* 10(5) (2014) 1940-1954.
